# Supplementary material
Source: Springer Nature journal article supplement (https://www.springermedizin.de/resource/supplementary/12871_2014_316_MOESM3_ESM.pdf/9429076)

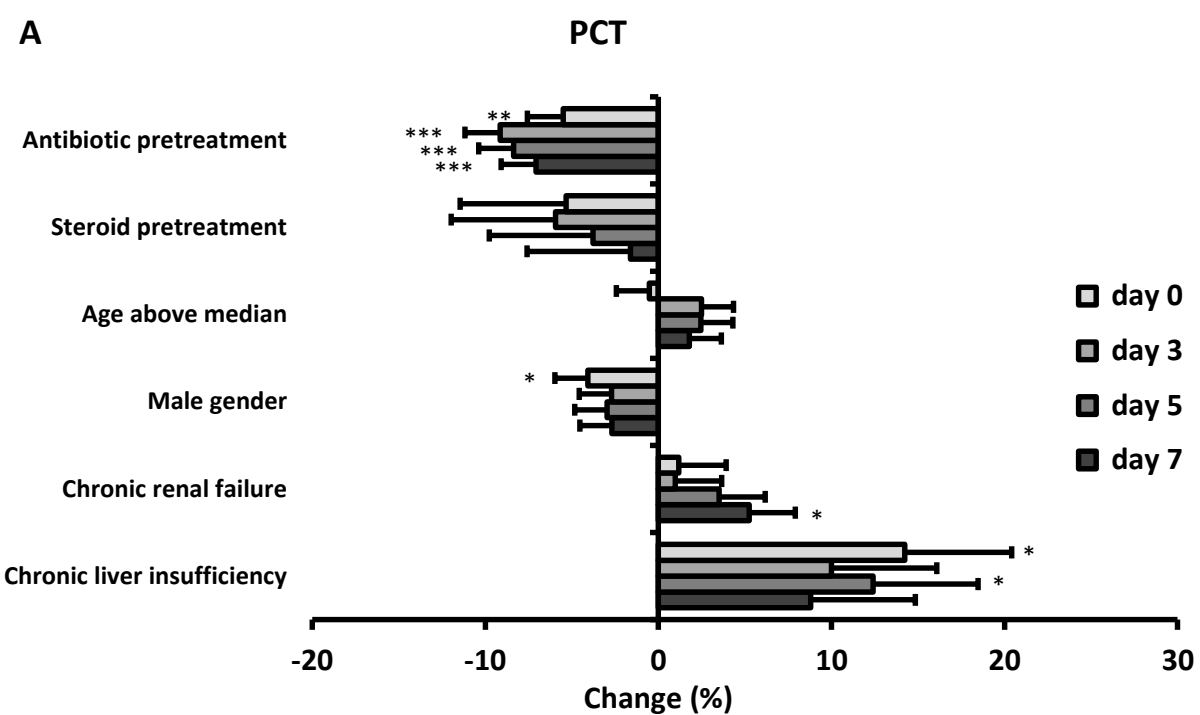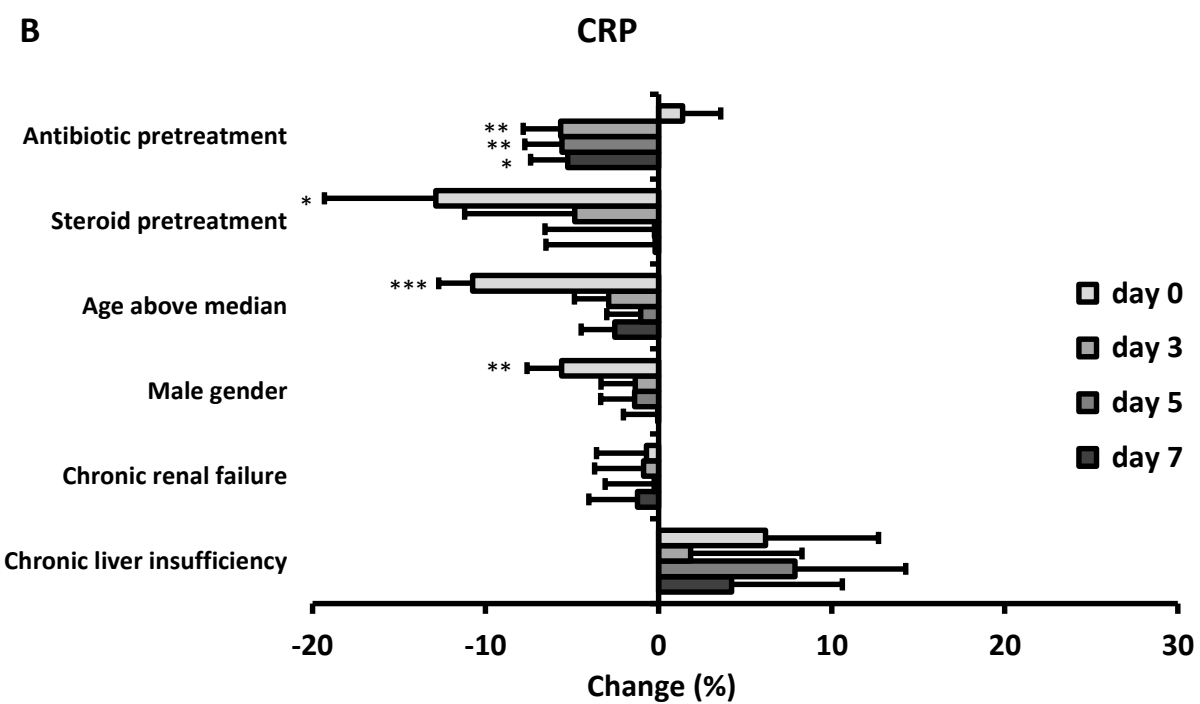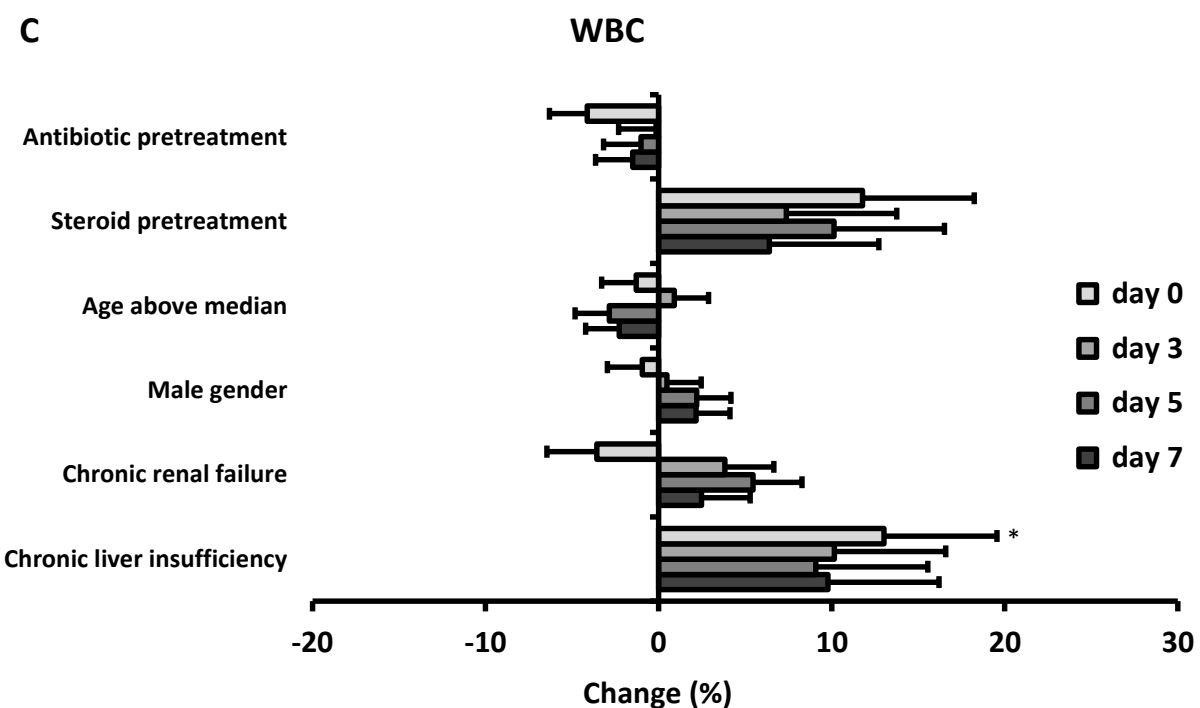

Supplement: MOESM3 [file 9429076]
